# Supplementary material for: The role of playgrounds in the development of children’s fundamental movement skills: A scoping review
Source: PubMed Central journal article supplement (PMC10718446; doi:10.1371/journal.pone.0294296), 2023-12-13

# PLOS ONE

## The role of playgrounds in the development of children's fundamental movement skills: A scoping review --Manuscript Draft--

|                                                                                                                                                                                                                                                                                          |                                                                                                                                                                                                                                                                                                                                                                                                                                                                                                                                                                                                                                                                                                                                                                                                                                                                                                                                                                                                                                                                                                                                                                                                                                                                                                                                                                                                                                                                                                                                                                                                                                                                                            |
|------------------------------------------------------------------------------------------------------------------------------------------------------------------------------------------------------------------------------------------------------------------------------------------|--------------------------------------------------------------------------------------------------------------------------------------------------------------------------------------------------------------------------------------------------------------------------------------------------------------------------------------------------------------------------------------------------------------------------------------------------------------------------------------------------------------------------------------------------------------------------------------------------------------------------------------------------------------------------------------------------------------------------------------------------------------------------------------------------------------------------------------------------------------------------------------------------------------------------------------------------------------------------------------------------------------------------------------------------------------------------------------------------------------------------------------------------------------------------------------------------------------------------------------------------------------------------------------------------------------------------------------------------------------------------------------------------------------------------------------------------------------------------------------------------------------------------------------------------------------------------------------------------------------------------------------------------------------------------------------------|
| <b>Manuscript Number:</b>                                                                                                                                                                                                                                                                | PONE-D-23-14269                                                                                                                                                                                                                                                                                                                                                                                                                                                                                                                                                                                                                                                                                                                                                                                                                                                                                                                                                                                                                                                                                                                                                                                                                                                                                                                                                                                                                                                                                                                                                                                                                                                                            |
| <b>Article Type:</b>                                                                                                                                                                                                                                                                     | Research Article                                                                                                                                                                                                                                                                                                                                                                                                                                                                                                                                                                                                                                                                                                                                                                                                                                                                                                                                                                                                                                                                                                                                                                                                                                                                                                                                                                                                                                                                                                                                                                                                                                                                           |
| <b>Full Title:</b>                                                                                                                                                                                                                                                                       | The role of playgrounds in the development of children's fundamental movement skills:<br>A scoping review                                                                                                                                                                                                                                                                                                                                                                                                                                                                                                                                                                                                                                                                                                                                                                                                                                                                                                                                                                                                                                                                                                                                                                                                                                                                                                                                                                                                                                                                                                                                                                                  |
| <b>Short Title:</b>                                                                                                                                                                                                                                                                      | Scoping review of playgrounds and fundamental movement skills                                                                                                                                                                                                                                                                                                                                                                                                                                                                                                                                                                                                                                                                                                                                                                                                                                                                                                                                                                                                                                                                                                                                                                                                                                                                                                                                                                                                                                                                                                                                                                                                                              |
| <b>Corresponding Author:</b>                                                                                                                                                                                                                                                             | Charlotte Skau Pawlowski<br>University of Southern Denmark<br>Odense M, DENMARK                                                                                                                                                                                                                                                                                                                                                                                                                                                                                                                                                                                                                                                                                                                                                                                                                                                                                                                                                                                                                                                                                                                                                                                                                                                                                                                                                                                                                                                                                                                                                                                                            |
| <b>Keywords:</b>                                                                                                                                                                                                                                                                         | fundamental movement skills; motor development; children; playground; Physical activity                                                                                                                                                                                                                                                                                                                                                                                                                                                                                                                                                                                                                                                                                                                                                                                                                                                                                                                                                                                                                                                                                                                                                                                                                                                                                                                                                                                                                                                                                                                                                                                                    |
| <b>Abstract:</b>                                                                                                                                                                                                                                                                         | <p>Fundamental movement skills are the basic skills children should develop but are low in children from high-income countries. Literature indicates that playgrounds can play an important role challenging children's balance, agility, and coordination. However, knowledge on the influence of playgrounds on children's fundamental movement skills development is fragmented. The aim of the present scoping review was to create an overview of all research that is relevant when studying the influence of unstructured playground play on children's fundamental movement skills. Four electronic databases (Scopus, Web of Science, SportDiscus, and PsycInfo) were searched systematically in May 2022 following the PRISMA guidelines, leading to a final set of twelve publications meeting the inclusion criteria. The results of these publications indicate that it is important to design playgrounds with various features targeting balance, climbing, throwing, and catching to provide opportunities for children to enhance each fundamental movement skills (i.e., stability, locomotor skills, and object control skills). Also, spreading features over a large area of the playground seems to ensure ample space per child, stimulate children to use locomotor skills by moving to and from features, and to play active games without equipment. Possibly, also natural play settings develop children's fundamental movement skills. These findings, however, should be read with caution. More experimental studies using objective and standardized fundamental movement skills tests are needed in this research field for a more robust conclusion.</p> |
| <b>Order of Authors:</b>                                                                                                                                                                                                                                                                 | Charlotte Skau Pawlowski<br>Cathrine Damsbo Madsen<br>Mette Toftager<br>Thea Toft Amholt<br>Jasper Schipperijn                                                                                                                                                                                                                                                                                                                                                                                                                                                                                                                                                                                                                                                                                                                                                                                                                                                                                                                                                                                                                                                                                                                                                                                                                                                                                                                                                                                                                                                                                                                                                                             |
| <b>Additional Information:</b>                                                                                                                                                                                                                                                           |                                                                                                                                                                                                                                                                                                                                                                                                                                                                                                                                                                                                                                                                                                                                                                                                                                                                                                                                                                                                                                                                                                                                                                                                                                                                                                                                                                                                                                                                                                                                                                                                                                                                                            |
| <b>Question</b>                                                                                                                                                                                                                                                                          | <b>Response</b>                                                                                                                                                                                                                                                                                                                                                                                                                                                                                                                                                                                                                                                                                                                                                                                                                                                                                                                                                                                                                                                                                                                                                                                                                                                                                                                                                                                                                                                                                                                                                                                                                                                                            |
| <b>Financial Disclosure</b>                                                                                                                                                                                                                                                              |                                                                                                                                                                                                                                                                                                                                                                                                                                                                                                                                                                                                                                                                                                                                                                                                                                                                                                                                                                                                                                                                                                                                                                                                                                                                                                                                                                                                                                                                                                                                                                                                                                                                                            |
| Enter a financial disclosure statement that describes the sources of funding for the work included in this submission. Review the <a href="#">submission guidelines</a> for detailed requirements. View published research articles from <a href="#">PLOS ONE</a> for specific examples. |                                                                                                                                                                                                                                                                                                                                                                                                                                                                                                                                                                                                                                                                                                                                                                                                                                                                                                                                                                                                                                                                                                                                                                                                                                                                                                                                                                                                                                                                                                                                                                                                                                                                                            |

This statement is required for submission and **will appear in the published article** if the submission is accepted. Please make sure it is accurate.

#### Unfunded studies

Enter: *The author(s) received no specific funding for this work.*

#### Funded studies

Enter a statement with the following details:

- Initials of the authors who received each award
- Grant numbers awarded to each author
- The full name of each funder
- URL of each funder website
- Did the sponsors or funders play any role in the study design, data collection and analysis, decision to publish, or preparation of the manuscript?
- **NO** - Include this sentence at the end of your statement: *The funders had no role in study design, data collection and analysis, decision to publish, or preparation of the manuscript.*
- **YES** - Specify the role(s) played.

\* typeset

#### Competing Interests

Use the instructions below to enter a competing interest statement for this submission. On behalf of all authors, disclose any [competing interests](#) that could be perceived to bias this work—acknowledging all financial support and any other relevant financial or non-financial competing interests.

This statement is **required** for submission and **will appear in the published article** if the submission is accepted. Please make sure it is accurate and that any funding sources listed in your Funding Information later in the submission form are also declared in your Financial Disclosure statement.

View published research articles from [PLOS ONE](#) for specific examples.

### NO authors have competing interests

Enter: *The authors have declared that no competing interests exist.*

### Authors with competing interests

Enter competing interest details beginning with this statement:

*I have read the journal's policy and the authors of this manuscript have the following competing interests: [insert competing interests here]*

\* typeset

### Ethics Statement

Enter an ethics statement for this submission. This statement is required if the study involved:

- Human participants
- Human specimens or tissue
- Vertebrate animals or cephalopods
- Vertebrate embryos or tissues
- Field research

Write "N/A" if the submission does not require an ethics statement.

General guidance is provided below.

Consult the [submission guidelines](#) for detailed instructions. **Make sure that all information entered here is included in the Methods section of the manuscript.**

**Format for specific study types**

**Human Subject Research (involving human participants and/or tissue)**

- Give the name of the institutional review board or ethics committee that approved the study
- Include the approval number and/or a statement indicating approval of this research
- Indicate the form of consent obtained (written/oral) or the reason that consent was not obtained (e.g. the data were analyzed anonymously)

**Animal Research (involving vertebrate animals, embryos or tissues)**

- Provide the name of the Institutional Animal Care and Use Committee (IACUC) or other relevant ethics board that reviewed the study protocol, and indicate whether they approved this research or granted a formal waiver of ethical approval
- Include an approval number if one was obtained
- If the study involved *non-human primates*, add *additional details* about animal welfare and steps taken to ameliorate suffering
- If anesthesia, euthanasia, or any kind of animal sacrifice is part of the study, include briefly which substances and/or methods were applied

**Field Research**

Include the following details if this study involves the collection of plant, animal, or other materials from a natural setting:

- Field permit number
- Name of the institution or relevant body that granted permission

**Data Availability**

Authors are required to make all data underlying the findings described fully available, without restriction, and from the time of publication. PLOS allows rare exceptions to address legal and ethical concerns. See the [PLOS Data Policy](#) and [FAQ](#) for detailed information.

Yes - all data are fully available without restriction

A Data Availability Statement describing where the data can be found is required at submission. Your answers to this question constitute the Data Availability Statement and **will be published in the article**, if accepted.

**Important:** Stating 'data available on request from the author' is not sufficient. If your data are only available upon request, select 'No' for the first question and explain your exceptional situation in the text box.

Do the authors confirm that all data underlying the findings described in their manuscript are fully available without restriction?

**Describe where the data may be found in full sentences. If you are copying our sample text, replace any instances of XXX with the appropriate details.**

- If the data are **held or will be held in a public repository**, include URLs, accession numbers or DOIs. If this information will only be available after acceptance, indicate this by ticking the box below. For example: *All XXX files are available from the XXX database (accession number(s) XXX, XXX).*
- If the data are all contained **within the manuscript and/or Supporting Information files**, enter the following: *All relevant data are within the manuscript and its Supporting Information files.*
- If neither of these applies but you are able to provide **details of access elsewhere**, with or without limitations, please do so. For example:

*Data cannot be shared publicly because of [XXX]. Data are available from the XXX Institutional Data Access / Ethics Committee (contact via XXX) for researchers who meet the criteria for access to confidential data.*

*The data underlying the results presented in the study are available from (include the name of the third party*

Data in the review is 12 publications owned by a third party and thus authors do not have permission to share the data

|                                                                                                                                                                                                                                         |                                                                                                                                     |
|-----------------------------------------------------------------------------------------------------------------------------------------------------------------------------------------------------------------------------------------|-------------------------------------------------------------------------------------------------------------------------------------|
| <p><i>and contact information or URL).</i></p> <ul style="list-style-type: none"><li>• This text is appropriate if the data are owned by a third party and authors do not have permission to share the data.</li></ul> <p>* typeset</p> |                                                                                                                                     |
| Additional data availability information:                                                                                                                                                                                               | Tick here if your circumstances are not covered by the questions above and you need the journal's help to make your data available. |

## Scoping review of playgrounds and fundamental movement skills

1           **The role of playgrounds in the development of children’s fundamental**  
2                                           **movement skills: A scoping review**

3 Charlotte Skau Pawlowski<sup>1,2\*</sup>, Cathrine Damsbo Madsen<sup>1,2</sup>, Mette Toftager<sup>1,2</sup>, Thea Toft Amholt<sup>3</sup>,  
4 Jasper Schipperijn<sup>1,2</sup>

5 <sup>1</sup>Research Unit for Active Living, Department of Sports Science and Clinical Biomechanics,  
6 University of Southern Denmark, Odense, Denmark

7 <sup>2</sup>Playground Research Center, University of Southern Denmark, Odense Denmark

8 <sup>3</sup>Center for Clinical Research and Prevention, Frederiksberg Hospital, Frederiksberg, Denmark

9

10 \* Corresponding author: Charlotte Skau Pawlowski, [cspawlowski@health.sdu.dk](mailto:cspawlowski@health.sdu.dk)

11

12 **Abstract**

13 Fundamental movement skills (FMS) are the basic skills children should develop but are low in  
14 children from high-income countries. Literature indicates that playgrounds can play an important  
15 role challenging children's balance, agility, and coordination. However, knowledge on the influence  
16 of playgrounds on children's FMS development is fragmented. The aim of the present scoping  
17 review was to create an overview of all research that is relevant when studying the influence of  
18 unstructured playground play on children's FMS. Four electronic databases (Scopus, Web of  
19 Science, SportDiscus, and PsycInfo) were searched systematically in May 2022 following the  
20 PRISMA guidelines, leading to a final set of twelve publications meeting the inclusion criteria. The  
21 results of these publications indicate that it is important to design playgrounds with various features  
22 targeting balance, climbing, throwing, and catching to provide opportunities for children to enhance  
23 each FMS (i.e., stability, locomotor skills, and object control skills). Also, spreading features over a  
24 large area of the playground seems to ensure ample space per child, stimulate children to use  
25 locomotor skills by moving to and from features, and to play active games without equipment.  
26 Possibly, also natural play settings develop children's FMS. These findings, however, should be  
27 read with caution. More experimental studies using objective and standardized FMS tests are  
28 needed in this research field for a more robust conclusion.

29



## 30 **Introduction**

31           Fundamental movement skills (FMS) are the basic skills children should be competent  
32 at, such as stability skills (e.g., sitting, standing, balancing), locomotor skills (e.g., running,  
33 jumping, climbing), and object control skills (e.g., throwing, catching) [1]. Preschool years are  
34 crucial in terms of developing various FMS [2]. Developing proficiency in these skills is important,  
35 as FMS provide an underlying base for successful participation in physical activities across the life  
36 course [1, 3, 4]. Despite the importance of FMS for physical activity, FMS are generally low in  
37 preschool and school aged children from high-income countries [5]. Also, a recent systematic  
38 review showed that children (3-10 years old) in 25 countries were not achieving the FMS  
39 competence required to successfully participate in physical activity [6]. The ability to perform and  
40 master different types of FMS has also been associated with school readiness and performance [7,  
41 8], social interaction with peers [9], and self-perception [10].

42           To increase FMS, many interventions have been developed in various contexts [11-  
43 13], but few FMS interventions have been implemented at scale [14]. Adult-directed, structured  
44 FMS programs are considered effective in developing children's FMS [15]. However, structured  
45 programs require educated staff and thus are expensive to conduct. Further, specific training only  
46 affects the development of the specific task trained and not necessarily other tasks related to the  
47 same FMS competence [16].

48           Literature also indicates that unstructured play at playgrounds is important for  
49 children's physical development, challenging their movement abilities such as balance, agility,  
50 coordination, and spatial awareness [17, 18]. This is also supported by the World Health  
51 Organization stating that active play and opportunities for unstructured physical activity can  
52 contribute to the development of motor skills in children under five years [19]. However,

53 playgrounds can be designed very differently, vary in size, features, and be built in conventional or  
54 natural materials. Further, studies addressing the influence of playgrounds on children's FMS  
55 development are carried out in different research fields with varying study designs, methods, and  
56 outcomes. A review of active play interventions aimed at promoting physical activity and FMS  
57 conducted in 2016 only included four studies [20], and could not draw firm conclusion due to the  
58 small number of eligible studies and their heterogeneity. Thus, knowledge on the role of  
59 playgrounds in children's FMS development is fragmented and a coherent overview of relevant  
60 research in this field is needed to help guide future FMS interventions [21, 22].

61 The aim of the present article was to create a global, interdisciplinary overview of  
62 relevant research investigating the influence of unstructured playground play on children's FMS to  
63 be able to identify and outline existing knowledge in this research field and hereby identify  
64 knowledge gaps and set the agenda for future research. To do this, we will conduct a comprehensive  
65 scoping review.

## 66 **Materials and methods**

67 The scoping review was conducted in accordance with the JBI methodology for  
68 scoping reviews [23] and the PRISMA guidelines were followed [24]. The review protocol was  
69 registered at Open Science Framework (<https://doi.org/10.17605/OSF.IO/UYN2V>) in May 2022.

70 The current scoping review is part of a broader project synthesizing evidence on the  
71 relationship between unstructured playground play and physical, mental, and social health among  
72 children and adolescents. Findings for other health outcomes than FMS when using playgrounds  
73 will be presented in separate publications.

## 74 **Search strategy**

75 Four electronic databases, Scopus, Web of Science, SportDiscus, and PsycInfo, were  
 76 searched systematically in May 20  Search terms were tested and revised by all authors (having  
 77 expertise in the research field) in collaboration with a research librarian from the University of  
 78 Southern Denmark. It was decided to create a comprehensive search strategy with two search  
 79 blocks to obtain all relevant research on the topic. One search block contained all identified  
 80 synonyms for ‘playground’, the other contained all identified synonyms for ‘children’. In Table 1,  
 81 the search terms are shown for Scopus. The search terms were slightly adapted to fit each database.

82 **Table 1. Search terms for Scopus**

83 **Table 2 Search terms for Scopus**

|                                                                                                                                                                                                                                                                                                                                                                                                                                                                                                                                                                                                                                                                                                                                                                                                                                                                                                                                                                                                                                                                                                                                                                                                                                                                                                                                                                                                                                                                                                                                                                                                                                                                                                                                                                                                                                                                                                                                                                                                                                                                                                                                                                                                                                                                                                                                                                                                                                                                                                                                                                                                                                                          |
|----------------------------------------------------------------------------------------------------------------------------------------------------------------------------------------------------------------------------------------------------------------------------------------------------------------------------------------------------------------------------------------------------------------------------------------------------------------------------------------------------------------------------------------------------------------------------------------------------------------------------------------------------------------------------------------------------------------------------------------------------------------------------------------------------------------------------------------------------------------------------------------------------------------------------------------------------------------------------------------------------------------------------------------------------------------------------------------------------------------------------------------------------------------------------------------------------------------------------------------------------------------------------------------------------------------------------------------------------------------------------------------------------------------------------------------------------------------------------------------------------------------------------------------------------------------------------------------------------------------------------------------------------------------------------------------------------------------------------------------------------------------------------------------------------------------------------------------------------------------------------------------------------------------------------------------------------------------------------------------------------------------------------------------------------------------------------------------------------------------------------------------------------------------------------------------------------------------------------------------------------------------------------------------------------------------------------------------------------------------------------------------------------------------------------------------------------------------------------------------------------------------------------------------------------------------------------------------------------------------------------------------------------------|
| <p>84 (TITLE (playground*)) OR (((TITLE-ABS (schoolyard* OR "school ground*") OR AUTHKEY (schoolyard* OR<br/>             85 "school ground*")) OR (TITLE-ABS (play W/3 (area* OR space* OR environment* OR field* OR natural OR nature<br/>             86 OR outdoor OR place* OR structure* OR equipment OR park*))) OR AUTHKEY (play W/3 (area* OR<br/>             87 space* OR environment* OR field* OR natural OR nature OR outdoor OR place* OR structure* OR<br/>             88 equipment OR park*))) OR (TITLE-ABS ((school* OR daycare* OR "day care" OR childcare OR "child<br/>             89 care" OR kindergarten*) W/6 (play OR playable OR played OR playing OR "physical* activit*" OR<br/>             90 "organi?ed activit*" OR "unorgani?ed activit*" OR "structured activit*" OR "unstructured activit*" OR<br/>             91 "recreation* activit*" OR "leisure activit*" OR "outdoor activit*" OR "vigorous activit*")) OR AUTHKEY ((<br/>             92 school* OR daycare* OR "day care" OR childcare OR "child care" OR kindergarten*) W/6 (play OR playable<br/>             93 OR played OR playing OR "physical* activit*" OR "organi?ed activit*" OR "unorgani?ed activit*" OR<br/>             94 "structured activit*" OR "unstructured activit*" OR "recreation* activit*" OR "leisure activit*" OR "outdoor<br/>             95 activit*" OR "vigorous activit*")) OR (TITLE-ABS (playfield* OR playplace* OR playscape* OR<br/>             96 playspace* OR "public open space") OR AUTHKEY (playfield* OR playplace* OR playscape* OR playspace*<br/>             97 OR "public open space")) OR (INDEXTERMS (playground)) OR (ABS (playground*) OR AUTHKEY (<br/>             98 playground*)) AND ((TITLE-ABS (adolescen* OR baby OR boy OR schoolboy* OR boyhood OR<br/>             99 girlhood OR child* OR schoolchild* OR girl OR schoolgirl* OR infan* OR juvenil* OR kid OR minor OR<br/>             100 newborn* OR new-born* OR paediatric* OR pediatric* OR preschool* OR puber* OR pubescen* OR teen*<br/>             101 OR tween* OR toddler* OR youth* OR student* OR schoolage*) OR AUTHKEY (adolescen* OR baby OR<br/>             102 boy OR schoolboy* OR boyhood OR girlhood OR child* OR schoolchild* OR girl OR schoolgirl* OR infan*<br/>             103 OR juvenil* OR kid OR minor OR newborn* OR new-born* OR paediatric* OR pediatric* OR preschool*<br/>             104 OR puber* OR pubescen* OR teen* OR tween* OR toddler* OR youth* OR student* OR schoolage*)) OR<br/>             105 (INDEXTERMS (child) OR INDEXTERMS (adolescent) OR INDEXTERMS (pediatric)))</p> |
|----------------------------------------------------------------------------------------------------------------------------------------------------------------------------------------------------------------------------------------------------------------------------------------------------------------------------------------------------------------------------------------------------------------------------------------------------------------------------------------------------------------------------------------------------------------------------------------------------------------------------------------------------------------------------------------------------------------------------------------------------------------------------------------------------------------------------------------------------------------------------------------------------------------------------------------------------------------------------------------------------------------------------------------------------------------------------------------------------------------------------------------------------------------------------------------------------------------------------------------------------------------------------------------------------------------------------------------------------------------------------------------------------------------------------------------------------------------------------------------------------------------------------------------------------------------------------------------------------------------------------------------------------------------------------------------------------------------------------------------------------------------------------------------------------------------------------------------------------------------------------------------------------------------------------------------------------------------------------------------------------------------------------------------------------------------------------------------------------------------------------------------------------------------------------------------------------------------------------------------------------------------------------------------------------------------------------------------------------------------------------------------------------------------------------------------------------------------------------------------------------------------------------------------------------------------------------------------------------------------------------------------------------------|

106 **Selection criteria**

107 For publications to be included in the current scoping review, the study needed to take  
 108 place on a playground. Playgrounds were defined as a place designed or designated to facilitate  
 109 play. For this review, we included  bly available outdoor playgrounds e.g., in parks or

110 neighborhoods, as well as playgrounds at early childhood education and care (ECEC) centers,  
111 schools, and healthcare centers. Publications that only examined sports facilities such as soccer  
112 fields, parkour parks, basketball courts, beach volley, etc. were excluded. Further, we differentiated  
113 between fixed (e.g., swings, monkey bars, trees) and portable playground features (e.g., balls and  
114 ropes). Publications only focusing on portable features were excluded. We included publications  
115 examining children aged 0-17. Also, we included all publications regardless of the children's health  
116 condition and physical abilities. We included scientific publications using all forms of study  
117 designs. Book reviews, conference abstracts, protocol papers, PhD dissertations and method  
118 development publications were excluded. Studies of unstructured play at the playground were  
119 included whereas studies only focusing on peer- and adult-led activities such as physical education,  
120 organized activities, or supervision on the playground were excluded as well as studies about  
121 playground policy. Articles that were peer-reviewed, published from January 2000 to May 2022,  
122 and written in English were included. There was no limit on country or origin of  
123 publications. Further, in the present review, studies were only included if FMS was one of the  
124 outcomes measured.

## 125 **Selection procedure**

126 All references were imported to Endnote 20.0.1 where duplicates were removed by  
127 one researcher (CM) and uploaded to Covidence. Then all authors screened the publications' title  
128 and abstract (Jun-Aug 2022) whereafter each full-text was assessed by two of the authors  
129 independently (Aug-Oct 2022). Conflicts were solved by one of two authors (CSP or JS). The  
130 reference list of 10 randomly chosen included publications were screened by one author (CM) for  
131 additional publications of relevance (Jan 2023). Due to the comprehensive search strategy, this did  
132 not result in additional publications being included. Therefore, we did not check all reference lists  
133 for included publications.

134 For the present review, all full-text publications investigating the association between  
135 unstructured playground play and FMS were selected. Relevant citations in these publications were  
136 screened but no additional publications of relevance were found. The results of the search and the  
137 study inclusion process are presented in a PRISMA flowchart, Fig 1.

138 **Fig 1. Flowchart for selected publications**

139 [See separate document]

140 **Data extraction**

141 For the current review, data extraction of the selected publications with FMS as a  
142 health outcome was completed by the first author (CSP) and cross-checked by MT. Data extracted  
143 included the aim of the publication, study design, participants, setting, health outcomes, methods  
144 used to measure FMS, and key findings relevant to the review, as well as general information about  
145 the study such as author, country, and year of publication.

146 **Results**

147 As seen in the PRISMA flowchart (Fig 1), the total number of hits was 66,279 related  
148 to the broad search on physical, social, and mental health outcomes in relation to children's  
149 playground use. After duplicates were removed 42,110 publications remained, of which 39,721  
150 irrelevant titles and abstracts were excluded leaving 2,389 full-text publications to be screened.  
151 1,941 full-text publications were excluded with reasons detailed in Fig 1. A total of 222  
152 publications met the inclusion criteria, of which, 12 included FMS as at least one of the health  
153 outcomes investigated. Extracted data from the 12 included publications can be found in Table 2.

154 **Table 2 Data extraction of the included publications**

155 [See at back in the document because of length]

## 156 **Characteristics of the studies**

157 Three publications were from the USA [25-27]. Two publications each were from  
158 Australia [28, 29] and Norway [30, 31]. The remaining publications were from Italy [32], England  
159 [21], Canada [33], Indonesia [34], and Spain [35] (one study per country).

160 Two studies were published in the years 2000-2009 [30, 33], six studies were  
161 published between 2010-2019 [26, 27, 29, 32, 34, 35], and the remaining four studies were  
162 published from 2020 onwards (May 2022) [21, 25, 28, 31].

163 Half of the publications were conducted in early childhood education and care  
164 (ECEC) centers (n=6) [21, 25, 26, 30, 31, 34]. Three publications were conducted in a public area  
165 (i.e., neighborhood, park, sports center) [29, 32, 35]. Two publications were conducted at  
166 rehabilitation centers for children [27, 33], and one publication in primary schools [28].

167 Ten studies included children as participants (n=10), except two studies that included  
168 adults. One study included parents [35] and one study included parents and ECEC staff members  
169 [31]. These two studies focused on adults' perceptions on children's' FMS. Most of the child  
170 studies included a population of traditionally developed children (n=8) [21, 25, 26, 28-30, 32, 34].  
171 One study included disabled children with Down syndrome [33] and one study included both  
172 typically developed and disabled children [27]. The age of the children studied varied widely across  
173 the publications included. Five of the studies included children from the age of three; 3-5 years  
174 (n=3) [21, 25, 26], 3-6 years (n=1) [34], and 3-15 years (n=1) [27]. Four studies included children  
175 from the age of five; 5 years (n=1) [32], 5-7 years (n=1) [30], 5-10 years (n=1) [29], and 5-12 years  
176 (n=1) [28]. One study investigated children aged 6-7 [33]. Socioeconomic status (SES) was  
177 infrequently reported and none of the studies had a focus on low SES population.

178 Ten study designs were cross-sectional without control groups [21, 25-29, 31, 33-35].  
179 Two studies were intervention studies, both with an experimental group and a control group [30,  
180 32]. All studies used quantitative methods. However, one study was a mixed methods study using  
181 qualitative adult interviews in combination with surveys [31].

182 Four of the publications solely measured FMS as an outcome [21, 25, 32], whereas the  
183 remaining eight publications investigated other health outcomes besides FMS such as social skills  
184 (n=3) [27, 31, 33], physical activity (n=3) [26, 29, 34], physical activity and physical fitness (n=1)  
185 [28], and weight status, social, and creative skills (n=1) [35].

186 Seven of the studies used test protocols to measure FMS, of which three studies used  
187 the Champs Motor Skills Protocol (CMSP) [21, 25, 26], one study used Pictorial Scale of Perceived  
188 Movement Skill Competence (PMCS) [34], one study used the Motor Fitness Test of the European  
189 Test of Physical Fitness (EUROFIT) [30], and two studies used selected items of validated FMS  
190 tests such as sprint run, vertical jump, side gallop, one leg balance, heel-to-toe walking, catch, and  
191 putting a medicine ball [28, 32]. Also, two studies each coded camera recordings [27, 33], and used  
192 survey [31, 35]. Loftesnes combined survey and interview. One study used the systematic  
193 observation method SOFIT [29].

## 194 **Size of playground and fundamental movement skills**

195 Two studies investigated the association between FMS and playground size in ECEC  
196 centers and primary schools, respectively. The cross-sectional study by True et al. 2017 including  
197 229 children aged 3-5 from 22 ECEC centers in USA found a small positive relationship (effect size  
198 0.33) between children's overall FMS competence and ECEC center playground size measured by  
199 Champs Motor Skills Protocol. Playground size was significantly associated with total motor score  
200 but not locomotor score and object control score individually [26]. In contrast, Grunseit et al. (2020)

201 found no association between playground size and FMS in a cross-sectional study FMS testing 210  
202 children aged 5-12 in 43 Australian primary schools when adjusting for relevant covariates.

## 203 **Playground setting and fundamental movement skills**

204 Three studies investigated FMS in relation to the setting of the playground. In a cross-  
205 sectional study conducted in two urban and two rural ECEC center playgrounds in Indonesia  
206 including in total 66 3-6-year-old children, Famelia et al. [34] found no main effect of rural versus  
207 urban ECEC center playgrounds for locomotor skills and perceived movement skill competence  
208 even though children at the rural ECEC center playgrounds were found to be more sedentary than  
209 children in the urban ECEC center playgrounds. The two Norwegian studies also investigated the  
210 association between play in rural areas and FMS in a ECEC setting. The one study was a post-  
211 intervention study evaluating newly built nature playgrounds in nine ECEC centers. After being  
212 used for minimum two days a week in a one-year period, 12 parents being interviewed experienced  
213 their 2-6-year-old children being more able to cope with motor skills [31]. Fjørtoft [30] conducted  
214 an intervention study investigating 5-7-year-old children's FMS after playing in a forest for 1-2  
215 hours per day (experimental group of 46 children from one ECEC center) versus playing in a  
216 traditional ECEC center playground for 1-2 hours per day (control group of 29 children from two  
217 different ECEC centers). At the posttest 9 months after the pretest, significant differences were  
218 found in eight out of nine FMS test items in the experimental group (flamingo balance ( $p<0.001$ ),  
219 plate tapping ( $p<0.001$ ), standing broad jump ( $p<0.001$ ), bent arm hang ( $p<0.001$ ), Indian skip  
220 ( $p<0.001$ ), sit-ups ( $p<0.01$ ), beam walking ( $p<0.01$ ), and shuttle run ( $p<0.01$ )) whereas the control  
221 group experienced a significant difference in three test items (standing broad jump ( $p<0.01$ ), bent  
222 arm hang ( $p<0.001$ ), and Indian skip ( $p<0.001$ )). Thus, the motor fitness test showed a general  
223 tendency that the children using the forest as a playscape performed better in a variety of motor  
224 skills than the children on the traditional playground [30].



## 225 **Playground features and fundamental movement skills**

226           Eight studies investigated FMS in relation to playground features. Six of the studies  
227 included traditionally developed children in ECEC centers (n=3) and public playgrounds (n=3),  
228 whereas two studies focused on disabled children on a playground in a child rehabilitation center.  
229 The one ECEC center study was a cross-sectional study from the USA including 172 3-5-year-old  
230 children conducted in 16 ECEC centers. They found that a higher-quality outdoor play environment  
231 (e.g., shade, number of play areas, bike path quality), and more outdoor play equipment were  
232 associated with higher locomotor skills measured using Champs Motor Skills Protocol [25]. In  
233 contrast, another cross-sectional study also using Champs Motor Skills Protocol to measure 133 3-  
234 5-year-old children from 12 UK ECEC centers found that time spent in active games without use of  
235 play equipment was positively associated with higher total FMS and locomotor skills scores [21].  
236 Active games with fixed or loose equipment were not associated with FMS in this study. Also, time  
237 spent in locomotion activities (i.e., moving while not engaged in an active play game) was  
238 negatively associated with total FMS and locomotor skills. In line with this, the third ECEC center  
239 study conducted among 229 3-5-year-old children in 22 ECEC centers also found that fixed and  
240 portable playground equipment were non-significant predictors to total gross motor scores when  
241 using Champs Motor Skills Protocol as an FMS measurement tool [26].

242           In a cross-sectional study from Spain, Gil-Madrona et al. [35] investigated the  
243 contribution of public playgrounds with classic features (such as slides, climbing frames, and  
244 swings) on children's FMS - seen from a parent perspective and found that 53.7% of the 1,019  
245 parents included in the study agreed with the positive contribution of public playgrounds to motor  
246 skills. An Italian intervention study investigated a public playground designed with specific features  
247 to promote mobility, balance and manuality. They showed a significant improvement in the  
248 experimental group of 5-year-old children (n=71) versus a control group of children (n=39) in four

249 out of six gross motor tasks (putting a medicine ball ( $p < 0.001$ ), one leg balance on left foot  
250 ( $p < 0.05$ ), balance on beam ( $p < 0.001$ ), and balance on platform ( $p < 0.001$ )) after 30 minutes of  
251 structured play and 30 minutes of unstructured play once a week for a 10 weeks period [32]. In an  
252 Australian cross-sectional study, Adams et al. [29] investigated three different public playgrounds; a  
253 traditional, an adventure, and a contemporary public playground, in relation to FMS by  
254 systematically observing play in 57 children aged 5-10 at the respective playgrounds. They found  
255 that children used a wider variety of features in the contemporary and adventure playgrounds  
256 compared to the traditional playground. However, no significant associations with FMS between the  
257 three types of public playgrounds was found, possibly because a low amount of time in motor-based  
258 activities was observed. Still, the most frequently performed FMS were locomotor skills (31.3%),  
259 whereas object control skills were rarely observed (0.0-0.2%) at the three different public  
260 playgrounds [29].

261           Oppositely, coding of camera recordings in a Canadian cross-sectional study  
262 conducted at a rehabilitation center playground showed that six 6-7-year-old children with Down  
263 syndrome spent a great amount of time in motor-based activities (90%) in the playground setting.  
264 The primary motor activity was swinging. The tasks appeared to become more difficult as the  
265 environment became more complex (i.e., from even surface to grass and incline surface) [33]. In a  
266 cross-sectional study conducted at a rehabilitation center playground in USA among 181 3-15-year-  
267 olds both typically developed and disabled children ( $n=41$ ), Miller et al. [27] coded camera  
268 recordings and found that novel use (i.e., ideation; child uses the equipment in a novel way), and  
269 motor planning (i.e., skilled, nonhabitual movements used to accomplish multistep tasks) were  
270 observed at all six playground features (sand and water table, jungle gym, Roller Slide, Mobius  
271 Climber, Cozy Dome, Omnispin Spinner). Novel use was observed most at a 'sand and water' table

272 and least at 'Mobius Climber' (a climbing wall). In contrast, motor planning was highest for the  
273 Mobius Climber and lowest for the 'sand and water' table [27].

## 274 **Discussion**

275 From the results, we realized that the 12 included publications investigated either the  
276 size, setting, and/or the features of the playground in relation to children's FMS. In the following,  
277 we will discuss our results and highlight how future playgrounds should be designed (size, setting,  
278 and features) to support FMS development of children.

### 279 **Do we need large playgrounds?**

280 Since studies have demonstrated that children are more active in large playgrounds  
281 [36, 37], it seems obvious to conclude that more space also provides more opportunities for FMS  
282 acquisition. In the study by Grunseit et al. [28], the authors found an association between the  
283 amount of playground space available and self-reported physical activity and objectively measured  
284 fitness, but interestingly they did not find an association between playground space and FMS.  
285 Given the strong predictive association between levels of physical activity and FMS competence [5]  
286 and the positive association between playground space and both physical activity and fitness  
287 showed in the study by Grunseit et al. [28], the reason for the lack of an association between  
288 playground space and FMS is unclear. However, in the study by True et al. [26], larger playground  
289 size was significantly associated with higher total FMS score. The reason could be that the age of  
290 the children in the two studies differed. In the study by Grunseit et al. [28], the children were 5-12  
291 years old whereas in the study by True et al. [26], the children were 3-5 years old (preschool years)  
292 which is identified as a crucial time in terms of forming and developing FMS [5]. It is therefore  
293 possible that the children in the study by Grunseit et al. [28] had past the crucial time for developing  
294 FMS lowering the influence of playground size on FMS. In fact, in another study they found that 3-

295 7 years-old children from rural areas with the lowest residential density had better FMS than their  
296 peers from urban areas with the highest residential density [38]. Although the focus in this study  
297 was not specifically on playgrounds, Niemiströ et al. [38] concluded that because children spend  
298 multiple hours in ECEC centers, they believe that the size of the outdoor environment near these  
299 centers (such as playgrounds) plays a notable role in children's motor development.

## 300 **Do we need nature playgrounds?**

301           Jointly, the two Norwegian studies included in this review [30, 31], indicated a  
302 positive impact of the natural environment on children's motor development. Also, a systematic  
303 review indicated some association between nature play and FMS even though this review did not  
304 focus specifically on playgrounds [39]. However, it is worth to examine  if the effect shown on  
305 green playgrounds is due to these playgrounds being placed in rural areas that might be larger and  
306 having a lower population density, as discussed above. In the study by Fjørtoft [30], the nature  
307 space used for playing by the experimental group of children was larger and herewith also lower in  
308 population density than the traditional playgrounds in the ECEC centers used by the control groups.  
309 Also, in the study by Loftesnes [31], the natural space used for building a nature playground was  
310 larger and lower in population density than the traditional playground. On the other hand, no effect  
311 of location was found in the study by Famelia et al. [34] investigating urban playgrounds in the city  
312 against rural playgrounds in farming areas in Indonesian ECEC centers. In this study, size or  
313 population density of the playgrounds were not mentioned, but it was described that limited space  
314 occurred at some settings, and they found children to be sedentary in the playgrounds around 70%  
315 of playground time, indicating that the playgrounds were relatively small. In line with this, a  
316 Norwegian study showed no differences in FMS competence of children attending nature  
317 preschools and traditional preschools [40]. This could support that playground size and density have  
318 a greater impact on FMS than nature itself. However, we know too little about how the natural

319 environment functions as a playground developing children's FMS to draw any conclusions on this  
320 topic.

## 321 **What features do we need on the playgrounds?**

322 In the study by Szeszulski et al. [25], the authors found both number of features and  
323 quality of features in the ECEC centers' outdoor environment to influence children's locomotor  
324 skills. On the other hand, Foweather et al. [21] found that time spent in active games without  
325 equipment was positively associated with higher locomotor skills score and total FMS. This finding  
326 suggests that spending more time on active games such as dancing, chasing games, and rough and  
327 tumble play without use of playground features may be important for FMS development. Also,  
328 previous research has demonstrated that preschool children in the highest locomotor skill tertile  
329 generally engaged in more dancing than children in the lowest tertile [41]. In the study by  
330 Foweather et al. [21], however, children spent a relatively large proportion of time (41%) engaged  
331 in active games with equipment, but this type of play was not associated with FMS, possibly  
332 because the children were frequently observed being sedentary on the equipment. It is possible that  
333 these pieces of equipment supported other FMS capacities, such as climbing or stability skills, not  
334 assessed in the study by Foweather et al. [21]. Nevertheless, this finding is similar to Adams et al.  
335 [29] reporting that the children used a wider variety of equipment in the contemporary and  
336 adventure playgrounds than the traditional playground, but they did not find a statistically  
337 significant association between the FMS observed at the three playgrounds varying in features.  
338 Also, these authors suggest that it is possible that the general low FMS mastery among children  
339 could be influenced by the lack of FMS required to play in playgrounds [29].

340 From the studies, however, various features seem to encourage varying motor  
341 competences making it complex to answer exactly what features are needed in the playground to

342 improve children's FMS development. In the study by Adams et al. [29], locomotor skills such as  
343 walking and running were observed most frequently in the contemporary playground where the  
344 features were spread over a large area requiring children to use locomotor skills to move around.  
345 Conversely, locomotor skills were observed less frequently at the adventure playground where the  
346 features were linked off a large walkway and children needed different FMS to move to and from  
347 different features such as balancing. Still, climbing nets were the most used play feature at the  
348 adventure playground also stimulating locomotor skills [29]. Climbing and hanging features are  
349 also important to develop upper-body strength [42]. Importantly, Adams et al. [29] and True et al.  
350 [26] found no association between playground play and object control skills. According to True et  
351 al. [26], features to improve object control skills seems not to be provided very often in playgrounds  
352 for preschool children. Also, a study found object control skills to develop at a slow rate before the  
353 age of 9-10 [43]. Portable features such as balls might influence object control skills. Portable  
354 features, however, was not studied in the current review. As Tortella et al. [32] showed, specifically  
355 targeted playground equipment may be necessary to encourage FMS development. The authors  
356 conclude, however, that specific training using specific playground features, only affects the  
357 development of that task trained and not necessarily other tasks related to the same FMS  
358 competence [32]. This conclusion is supported by Revie and Larkin [16] investigating the effects of  
359 eight sessions of intensive teaching of FMS in children with poor coordination.

360 A sensory-rich playground provided with varied features, enticing colors, and  
361 multitextured materials also seem to be valuable for the development of children with disabilities  
362 [27]. However, according to Virji-Babul et al. [33] children with disabilities seem to have more  
363 difficulties in extracting and processing relevant information from the physical environment than  
364 children traditionally developed, leading to decreased engagement in free play at the playground.

365 Thus, it also seems important that playground features are easy to interpret and can be used at  
366 different developmental stages.

## 367 **Strengths and limitations**

368 We followed a robust review protocol, thus the risk of bias in our review methodology  
369 is low [23]. Further, a strength is that the search procedure was developed by a research group of  
370 experts in the research field of playground usage in collaboration with a librarian with huge  
371 expertise in search strategies. To capture as much relevant research, four different databases were  
372 searched. However, given the large number of publications retrieved, we questioned if we should  
373 have created a third block containing health outcomes to narrow-down our search. Also, no quality  
374 assessment of included publications was performed. Since only 12 publications were included in the  
375 present scoping review, we wanted to cover all knowledge on the subject regardless of the design  
376 and quality of the study. A challenge was that the publications used many different child-  
377 monitoring instruments to measure FMS, possibly because there is little agreement on what FMS  
378 measurement should be used [44].

## 379 **Conclusion and future directions**

380 The aim of the current scoping review was to create an overview of all research that is  
381 relevant when studying the influence of unstructured playground play on children's FMS. Twelve  
382 studies investigated unstructured playground play and children's FMS. From the current scoping  
383 review, it seems important to design playgrounds with various features targeting balance, climbing,  
384 throwing, and catching to provide opportunities for children to enhance each FMS (i.e., stability,  
385 locomotor skills, and object control skills). Also, spreading features over a large area seems to both  
386 ensure ample space per child and to stimulate children to use locomotor skills by moving to and  
387 from features and by playing active games without equipment. Possibly, also natural play settings

388 develop children's FMS. Our results, however, should be read with caution. Overall, based on only  
389 12 studies reviewed, we still know too little about the association between unstructured playground  
390 play and FMS, and more effort should be dedicated to future studies in this field. In particular, we  
391 need more experimental studies using objective and standardized FMS tests since only two of the  
392 12 studies had this high-quality design. Therefore, it is needed also to discuss the quality of the used  
393 FMS tests in future research.

## 394 **Acknowledgement**

395 We thank academic officer Danielle Nørager Johansen from University of Southern  
396 Denmark who helped organizing and coordinating the search and extraction process. Also, thanks to  
397 librarian Lasse Østergaard from University of Southern Denmark who helped with the search  
398 strategi.

## 399 **References**

- 400 1. Hulteen RM, Morgan PJ, Barnett LM, Stodden DF, Lubans DR. Development of  
401 Foundational Movement Skills: A Conceptual Model for Physical Activity Across the  
402 Lifespan. *Sports Medicine*. 2018; 48(7): 1533-1540.
- 403 2. Xin F, Chen ST, Clark C, Hong JT, Liu Y, Cai YJ. Relationship between Fundamental  
404 Movement Skills and Physical Activity in Preschool-aged Children: A Systematic Review.  
405 *International Journal of Environmental Research and Public Health*. 2020; 17(10).
- 406 3. Lima RA, Pfeiffer K, Larsen LR, Bugge A, Moller NC, Anderson LB, et al. Physical  
407 Activity and Motor Competence Present a Positive Reciprocal Longitudinal Relationship  
408 Across Childhood and Early Adolescence. *Journal of Physical Activity and Health*. 2017;  
409 14(6): 440-447.
- 410 4. Robinson LE, Stodden DF, Barnett LM, Lopes VP, Logan SW, Rodrigues LP, et al. Motor  
411 Competence and its Effect on Positive Developmental Trajectories of Health. *Sports  
412 Medicine*. 2015; 45(9): 1273-1284.
- 413 5. Hardy LL, Reinten-Reynolds T, Espinel P, Zask A, Okely AD. Prevalence and Correlates of  
414 Low Fundamental Movement Skill Competency in Children. *Pediatrics*. 2012; 130(2):  
415 E390-E398.
- 416 6. Bolger LE, Bolger LA, O'Neill C, Coughlan E, O'Brien W, Lacey S, et al. Global levels of  
417 fundamental motor skills in children: A systematic review. *Journal of Sports Science*. 2021;  
418 39(7): 717-753.
- 419 7. Ericsson I, Karlsson MK. Motor skills and school performance in children with daily  
420 physical education in school-a 9-year intervention study. *Scandinavian Journal of Medicine  
421 and Science in Sports*. 2014; 24(2): 273-8.



- 422 8. van der Fels IM, Te Wierike SC, Hartman E, Elferink-Gemser MT, Smith J, Visscher C.  
 423 The relationship between motor skills and cognitive skills in 4-16 year old typically  
 424 developing children: A systematic review. *Journal of Science and Medicine in Sport*. 2015;  
 425 18(6): 697-703.
- 426 9. Herrmann C, Bretz K, Kühnis J, Seelig H, Keller R, Ferrari I. Connection between Social  
 427 Relationships and Basic Motor Competencies in Early Childhood. *Children-Basel*. 2021;  
 428 8(1).
- 429 10. Vedul-Kjelsås V, Sigmundsson H, Stensdotter AK, Haga M. The relationship between  
 430 motor competence, physical fitness and self-perception in children. *Child: Care, Health and*  
 431 *Development*. 2012; 38(3): 394-402.
- 432 11. Lai SK, Costigan SA, Morgan PJ, Lubans DR, Stodden DF, Salmon J, et al. Do School-  
 433 Based Interventions Focusing on Physical Activity, Fitness, or Fundamental Movement  
 434 Skill Competency Produce a Sustained Impact in These Outcomes in Children and  
 435 Adolescents? A Systematic Review of Follow-Up Studies. *Sports Medicine*. 2014; 44(1):  
 436 67-79.
- 437 12. Morgan PJ, Barnett LM, Cliff DP, Okely AD, Scott HA, Cohen KE, et al. Fundamental  
 438 movement skill interventions in youth: a systematic review and meta-analysis. *Pediatrics*.  
 439 2013; 132(5): e1361-83.
- 440 13. Jiménez-Díaz J, Chaves-Castro K, Salazar W. Effects of Different Movement Programs on  
 441 Motor Competence: A Systematic Review With Meta-Analysis. *Journal of Physical Activity*  
 442 *and Health*. 2019; 16(8): 657-666.
- 443 14. Ma J, Hogan MJ, Eyre EL, Lander N, Barnett LM, Duncan MJ. Enhancing the  
 444 implementation and sustainability of fundamental movement skill interventions in the UK  
 445 and Ireland: lessons from collective intelligence engagement with stakeholders. *International*  
 446 *Journal of Behavioral Nutrition and Physical Activity*. 2021; 18(1).
- 447 15. Logan SW, Robinson LE, Wilson AE, Lucas WA. Getting the fundamentals of movement: a  
 448 meta-analysis of the effectiveness of motor skill interventions in children. *Child: Care,*  
 449 *Health and Development*. 2012; 38(3): 305-15.
- 450 16. Revie G, Larkin D. Task specific intervention with children reduces movement problems.  
 451 *Adapted Physical Activity Quarterly*. 1993, 10: 29-41.
- 452 17. Berg, S. Children's Activity Levels in Different Playground Environments: An  
 453 Observational Study in Four Canadian Preschools. *Early Childhood Education Journal*.  
 454 2015; 43(4): 281-287.
- 455 18. Bento G, Dias G. The importance of outdoor play for young children's healthy development.  
 456 *Porto Biomedical Journal*. 2017; 2(5): 157-160.
- 457 19. World Health Organization. Guidelines on physical activity, sedentary behaviour and sleep  
 458 for children under 5 years of age. 2019; License: CC BY-NC-SA 3.0 IGO: [Available from:  
 459 <https://apps.who.int/iris/handle/10665/311664>].
- 460 20. Johnstone A, Hughes AR, Martin A, Reilly JJ. Utilising active play interventions to promote  
 461 physical activity and improve fundamental movement skills in children: a systematic review  
 462 and meta-analysis. *BMC Public Health*. 2018; 18(1): 789.
- 463 21. Fowweather L, Crotti M, Foulkes JD, O'Dwyer MV, Utesch T, Knowles ZR, et al.  
 464 Foundational Movement Skills and Play Behaviors during Recess among Preschool  
 465 Children: A Compositional Analysis. *Children-Basel*. 2021; 8(7).
- 466 22. Parrish AM, Yeatman H, Iverson D, Russell K. Using interviews and peer pairs to better  
 467 understand how school environments affect young children's playground physical activity  
 468 levels: a qualitative study. *Health Education Research*. 2012; 27(2): 269-80.

- 469 23. Peters MDJ, Godfrey C, McInerney P, Munn Z, Tricco AC, Khalil H. Chapter 11: Scoping  
 470 reviews, in *JBIM Manual for Evidence Synthesis*, E. Aromataris and Z. Munn, Editors. JBI;  
 471 2020
- 472 24. PRISMA for Scoping Reviews. 2018; Available from: [www.prisma-](http://www.prisma-statement.org/Extensions/ScopingReviews)  
 473 [statement.org/Extensions/ScopingReviews](http://www.prisma-statement.org/Extensions/ScopingReviews).
- 474 25. Szeszulski J, Lorenzo E, Todd M, O'Connor TM, Hill J, Shaibi GQ, et al. Early Care and  
 475 Education Center Environmental Factors Associated with Product- and Process-Based  
 476 Locomotor Outcomes in Preschool-Age Children. *International Journal of Environmental  
 477 Research and Public Health*. 2022. 19(4).
- 478 26. True L, Pfeiffer KA, Dowda M, Williams HG, Brown WH, O'Neill JR, et al. Motor  
 479 competence and characteristics within the preschool environment. *Journal of Science and  
 480 Medicine in Sport*. 2017; 20(8): 751-755.
- 481 27. Miller LJ, Schoen SA, Camarata SM, McConkey J, Kanics IM, Valdez A, et al. Play in  
 482 natural environments: A pilot study quantifying the behavior of children on playground  
 483 equipment. *Journal of Occupational Therapy, Schools, & Early Intervention*. 2017; 10(3):  
 484 213-231.
- 485 28. Grunseit AC, O'Hara BJ, Drayton B, Learnihan V, Hardy LL, Clark E, et al., Ecological  
 486 study of playground space and physical activity among primary school children. *BMJ Open*.  
 487 2020; 10(6).
- 488 29. Adams J, Veitch J, Barnett L. Physical Activity and Fundamental Motor Skill Performance  
 489 of 5-10 Year Old Children in Three Different Playgrounds. *International Journal of  
 490 Environmental Research and Public Health*. 2018; 15(9).
- 491 30. Fjørtoft I. The Natural Environment as a Playground for Children: The Impact of Outdoor  
 492 Play Activities in Pre-Primary School Children. *Early Childhood Education Journal*. 2001;  
 493 29: 111-117.
- 494 31. Loftesnes JM, In the nature playground - initiation and evaluation of the project at 9  
 495 kindergartens. *Pitesti*. 2021; Feb: 542-548.
- 496 32. Tortella P, Haga M, Loras H, Sigmundsson H, Fumagalli G. Motor Skill Development in  
 497 Italian Pre-School Children Induced by Structured Activities in a Specific Playground. *PLoS  
 498 One*. 2016; 11(7): e0160244.
- 499 33. Virji-Babul N, Hovorka R, Jobling A. Playground dynamics: Perceptual-motor behaviour  
 500 and peer interactions of young children with Down syndrome. *Journal on Developmental  
 501 Disabilities*. 2006; 12(1): 29-44.
- 502 34. Famelia R, Tsuda E, Bakhtiar S, Goodway J. Relationships among perceived and actual  
 503 motor skill competence and physical activity in Indonesian preschoolers. *Journal of Motor  
 504 Learning and Development*. 2018; 6: 1-12.
- 505 35. Gil-Madrona P, Martínez-López M, Prieto-Ayuso A, Saraiva L, Vecina-Cifuentes J,  
 506 Vicente-Ballesteros T, et al. Contribution of Public Playgrounds to Motor, Social, and  
 507 Creative Development and Obesity Reduction in Children. *Sustainability*. 2019; 11(14).
- 508 36. Worobey J, Worobey HS, Adler AL. Diet, activity and BMI in preschool-aged children:  
 509 Differences across settings. *Ecology of Food and Nutrition*. 2005; 44(6): 455-466.
- 510 37. Escalante Y, Backx K, Saavedra JM, García-Hermoso A, Dominguez AM. Play area and  
 511 physical activity in recess in primary schools. *Kinesiology: international journal of  
 512 fundamental and applied kinesiology*. 2012; 44: 123-9.
- 513 38. Niemistö D, Finni T, Haapala EA, Cantell M, Korhonen E, Sääkslahti A. Environmental  
 514 Correlates of Motor Competence in Children-The Skilled Kids Study. *International Journal  
 515 of Environmental Research in Public Health*. 2019; 16(11).

- 516 39. Dankiw KA, Tsiros MD, Baldock KL, Kumar S. The impacts of unstructured nature play on  
517 health in early childhood development: A systematic review. *PLoS One*. 2020; 15(2):  
518 e0229006.
- 519 40. Lysklett OB, Berg A, Moe B. Motor competence and physical fitness among children  
520 attending nature preschools and traditional preschools. *International Journal of Play*. 2019;  
521 8(1): 53-64.
- 522 41. O'Neill JR, Williams HG, Pfeiffer KA, Dowda M, McIver KL, Brown WH, et al. Young  
523 children's motor skill performance: relationships with activity types and parent perception of  
524 athletic competence. *Journal of Science in Medicine and Sport*. 2014; 17(6): 607-10.
- 525 42. Sutterly J, Thornton C. It doesn't just happen! Essential contributions from playgrounds.  
526 *Young Children*. 2005; 60: 26-33.
- 527 43. Butterfield SA, Angell RM, Mason CA. Age and sex differences in object control skills by  
528 children ages 5 to 14. *Perceptual and Motor Skills*. 2012; 114(1): 261-74.
- 529 44. Haywood KM, Getchell N. Life span motor development. 4th ed. *Human Kinetics*; 2005  
530

531 **Table 1.** Included publications studying the influence of unstructured playground play on children’s  
 532 fundamental movement skills.

| Author, year, and country          | Study aim                                                            | Study design    | Population             | Setting                                                                       | Health outcome(s) | FMS measurement  | FMS Result(s)                                                                                                                                                                                                                                                                                                                                                                                                                                                                            |
|------------------------------------|----------------------------------------------------------------------|-----------------|------------------------|-------------------------------------------------------------------------------|-------------------|------------------|------------------------------------------------------------------------------------------------------------------------------------------------------------------------------------------------------------------------------------------------------------------------------------------------------------------------------------------------------------------------------------------------------------------------------------------------------------------------------------------|
| Adams et al (2018), Australia [29] | Whether playground design facilitated different levels of PA and FMS | Cross-sectional | 57 children, 5-10 yrs. | Neighborhood (3 playgrounds in 1 city; traditional, adventure, contemporary). | FMS + PA          | SOFIT (modified) | <p>There were no significant associations with FMS between the three playgrounds.</p> <p>The most frequent performed FMS were locomotor skills (31.3%), specifically walking (18.3%) and running (11.3%). Body management skills (15.2%) and climbing (12.3%) was also observed at all three playgrounds, whereas object control skills such as catching and throwing were rarely observed (0.0-0.2%)</p> <p>Children performed few FMS but used a wider variety of equipment in the</p> |

Scoping review of playgrounds and fundamental movement skills

|                                      |                                                            |                                                                                        |                                                      |                                                  |          |                                              |                                                                                                                                                                                                                                                                                                                                                                                                                                                   |
|--------------------------------------|------------------------------------------------------------|----------------------------------------------------------------------------------------|------------------------------------------------------|--------------------------------------------------|----------|----------------------------------------------|---------------------------------------------------------------------------------------------------------------------------------------------------------------------------------------------------------------------------------------------------------------------------------------------------------------------------------------------------------------------------------------------------------------------------------------------------|
|                                      |                                                            |                                                                                        |                                                      |                                                  |          |                                              | contemporary and adventure playgrounds .                                                                                                                                                                                                                                                                                                                                                                                                          |
| Famelia et al (2018), Indonesia [34] | Relationships among FMS, playground PA, and gender         | Cross-sectional                                                                        | 66 children, 3-6 yrs.                                | 4 childcare centers (2 urban + 2 rural)          | FMS + PA | PMSC + the Test of Gross Motor Development-3 | No main effect of location for locomotor skills and perceived movement skill competence.                                                                                                                                                                                                                                                                                                                                                          |
| Fjørtoft (2001), Norway [30]         | How playing in the natural environment might stimulate FMS | Intervention (play in forest versus traditional playground 1-2 hours/day for 9 months) | 75 children, 5-7 yrs. (46 in the experimental group) | 3 childcare centers (1 experimental + 2 control) | FMS      | EUROFIT + Beam walking and Indian skip       | At the posttest 9 months after the pretest, significant differences were found in eight out of nine FMS test items in the experimental group (flamingo balance (p<0.001), plate tapping (p<0.001), standing broad jump (p<0.001), bent arm hang (p<0.001), Indian skip (p<0.001), sit-ups (p<0.01), beam walking (p<0.01), and shuttle run (p<0.01)) whereas the control group experienced a significant difference in three test items (standing |

Scoping review of playgrounds and fundamental movement skills

|                                      |                                                                          |                 |                        |                                   |                                  |                             |                                                                                                                                                                                                                                                                                                                        |
|--------------------------------------|--------------------------------------------------------------------------|-----------------|------------------------|-----------------------------------|----------------------------------|-----------------------------|------------------------------------------------------------------------------------------------------------------------------------------------------------------------------------------------------------------------------------------------------------------------------------------------------------------------|
|                                      |                                                                          |                 |                        |                                   |                                  |                             | <p>broad jump (<math>p &lt; 0.01</math>), bent arm hang (<math>p &lt; 0.001</math>), and Indian skip (<math>p &lt; 0.001</math>).</p> <p>At the pretest the experimental group scored lower than the control group, but scored better in all test items at the posttest</p>                                            |
| Foweather et al (2021), England [21] | The association between play behavior and FMS during recess at preschool | Cross-sectional | 133 children, 3-5 yrs. | 12 childcare centers              | FMS                              | Video-assessment using CMSP | Relative to time spent in other types of play behaviors, time spent in play without equipment was positively associated with total FMS and locomotor skills, while time spent in locomotion activities (moving while not engaged in an active play game) was negatively associated with total FMS and locomotor skills |
| Gil-Madrona et al                    | The contribution of public playgrounds to                                | Cross-sectional | 1019 adults            | Neighborhood (41 parks in 1 city) | FMS, weight status, and social + | Survey                      | 53.7% parents agreed with the positive                                                                                                                                                                                                                                                                                 |

## Scoping review of playgrounds and fundamental movement skills

|                                       |                                                                        |                                                                                                                         |                                       |                                            |                           |                             |                                                                                                                                                                                                                                                        |
|---------------------------------------|------------------------------------------------------------------------|-------------------------------------------------------------------------------------------------------------------------|---------------------------------------|--------------------------------------------|---------------------------|-----------------------------|--------------------------------------------------------------------------------------------------------------------------------------------------------------------------------------------------------------------------------------------------------|
| (2019), Spain [35]                    | obesity reduction, motor, social, and creative development             |                                                                                                                         |                                       |                                            | creative skills           |                             | contribution of public playgrounds to motor skills (38% quite agree and 15.7% totally agree).                                                                                                                                                          |
| Grunseit et al (2020), Australia [28] | Relationship between school playground size and PA, fitness, and FMS   | Cross-sectional                                                                                                         | 5238 children, 5-12 yrs.              | 43 primary schools                         | FMS, PA, Physical fitness | Scoring of 7 FMS skills     | No association between playground space and motor skills.                                                                                                                                                                                              |
| Loftesnes (2021), Norway [31]         | Evaluating a new-built nature playground for children aged 2-6 years   | Cross-sectional post-intervention study (Build a nature playground and use it for min 2 days a week for an entire year) | 30 adults (18 staff + 12 parents)     | 9 childcare centers                        | FMS, social skills        | Survey + interview          | Parents found their child being more able to cope with motor skills.                                                                                                                                                                                   |
| Miller et al (2017), USA [27]         | Quantify equipment/areas impacted for children with sensory challenges | Cross-sectional                                                                                                         | 181 children, 3-15 yrs. (41 disabled) | child rehabilitation center (1 playground) | FMS, social skills        | Coding of camera recordings | The behavior most often observed across all pieces of equipment was novel use, ranging from 41.82-97.66% of the time. Least = Mobius, most = sand and water. Motor planning was highest for the Mobius Climber (58.18%) and lowest for sand and water. |

Scoping review of playgrounds and fundamental movement skills

|                                   |                                                                                       |                                                                                                    |                                                     |                                                                   |         |                                                                                 |                                                                                                                                                                                                                                                             |
|-----------------------------------|---------------------------------------------------------------------------------------|----------------------------------------------------------------------------------------------------|-----------------------------------------------------|-------------------------------------------------------------------|---------|---------------------------------------------------------------------------------|-------------------------------------------------------------------------------------------------------------------------------------------------------------------------------------------------------------------------------------------------------------|
| Szeszulski et al (2022), USA [25] | Association between the characteristics of the childcare center environment and FMS   | Cross-sectional                                                                                    | 172 children, 3-5 yrs.                              | 16 childcare centers                                              | FMS, PA | PACER (product-based locomotor skills)<br>CMSP (process-based locomotor skills) | Better outdoor play environment quality score and more outdoor equipment were positively associated with higher CMSP scores.                                                                                                                                |
| Tortella et al (2016), Italy [32] | Effects of structured and unstructured activities played at the playground on FMS     | Intervention (10 weeks – 1 hour half structured and half unstructured play at specific playground) | 110 children, 5 yrs. (71 in the experimental group) | Neighborhood (1 playground)                                       | FMS     | Scoring of 9 FMS skills (3 for fine and 6 for gross motor skills)               | The experimental group improved significantly in 4 out of 6 gross motor tasks (putting a medicine ball (p<0.001), one leg balance on left foot (p<0.05), balance on beam (p<0.001), and balance on platform (p<0.001)) and in none of the fine motor tasks. |
| True et al (2017), USA [26]       | The contribution of various preschool environmental characteristics to children's FMS | Cross-sectional                                                                                    | 229 children, 3-5 yrs.                              | 22 childcare centers (4 head start, 7 faith-based, 11 commercial) | FMS, PA | CMSP                                                                            | Playground size is a significant predictor of total motor score (effect size 0.33) when adjusting the analyses for other significant predictors, e.g., age, classroom size, teacher education and electronic                                                |



Scoping review of playgrounds and fundamental movement skills

|                                       |                                                               |                 |                              |                               |                     |                             |                                                                                                                                                                                                                                                                                    |
|---------------------------------------|---------------------------------------------------------------|-----------------|------------------------------|-------------------------------|---------------------|-----------------------------|------------------------------------------------------------------------------------------------------------------------------------------------------------------------------------------------------------------------------------------------------------------------------------|
|                                       |                                                               |                 |                              |                               |                     |                             | media use but not locomotor score and object control score, individually.<br><br>Time spent in outdoor open spaces, fixed and portable playground equipment were non-significant predictors to total gross motor scores.                                                           |
| Virji-Babul et al (2006), Canada [33] | Analyzing the level of motor engagement within the playground | Cross-sectional | 6 children with DS, 6-7 yrs. | 1 Child rehabilitation center | FMS + social skills | Coding of camera recordings | Children spent a great amount of time in motor-based activities (90%) in a playground setting.<br><br>The primary motor activity was swinging. The tasks appeared to become more difficult as the environment became more complex (even surface versus grass and incline surface). |

533 CMSP=the Champs Motor Skill Protocol; DS=Downs syndrome; EUROFIT= European Test of Physical Fitness, the  
 534 Motor Fitness Test; FMS=fundamental movement skills; PA=physical activity; PACER=the Progressive Aerobic  
 535 Cardiovascular Endurance Run; PMSC= Pictorial Scale of Perceived Movement Skill Competence; yrs.=years;  
 536 SOFIT=System for Observing Fitness Instruction Time

537  
 538

**Figure 2** Flowchart for selected publications

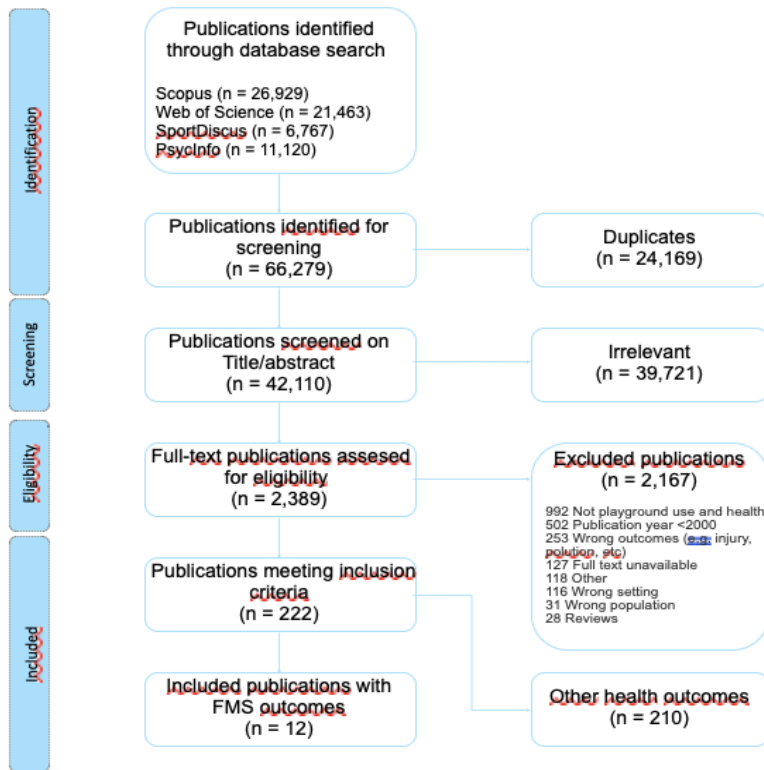

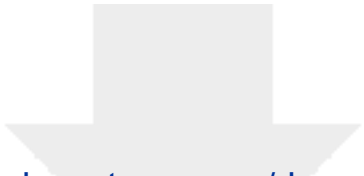

Click here to access/download  
**Supporting Information**  
PRISMA-Checklist.docx



Supplement: pone.0294296.s003.pdf [file pone.0294296.s003.pdf]
